# Supplementary material for: Automatic segmentation of hemorrhagic transformation on follow-up non-contrast CT after acute ischemic stroke
Source: Front Neuroinform. 2024 Apr 16;18:1382630. doi: 10.3389/fninf.2024.1382630 (PMC11058994; doi:10.3389/fninf.2024.1382630)
Supplement: Supplementary file 1 [file Table_1.XLSX]

## Sheet: SAMIHS training results
	Dice similarity coefficient (DSC)
	Total	HI2	PH	Training time for total patients (hour)
Fold0	0.68	0.5799	0.6788	10.5
Fold1	0.6356	0.6634	0.7374	10.33
Fold2	0.6376	0.63	0.6647	10.25
Fold3	0.6732	0.7438	0.7052	10.67
Fold4	0.6855	0.5909	0.67	10.5
Average	0.66238	0.6416	0.69122	10.45
